# Supplementary material for: Structure and luminescence properties of multicolor phosphor Ba2La3(GeO4)3F:Tb3+,Eu3+
Source: Royal Society of Chemistry journal article supplement (doi:10.1039/c9ra05915f), 2019-01-01
Supplement: c9ra05915f1.pdf [file c9ra05915f1.pdf]

**Supporting Information for:**

**Structure and luminescence properties of multicolor phosphor**

**Ba<sub>2</sub>La<sub>3</sub>(GeO<sub>4</sub>)<sub>3</sub>F:Tb<sup>3+</sup>,Eu<sup>3+</sup>**

Xiaoxue Ma <sup>a</sup>, Libing Liao<sup>a,\*</sup>, Qingfeng Guo<sup>b</sup>, Haikun Liu<sup>a</sup>, Dan Yang<sup>a</sup>, Ning Liu<sup>a</sup>, Lefu Mei<sup>a,\*</sup>

<sup>a</sup> *Beijing Key Laboratory of Materials Utilization of Nonmetallic Minerals and Solid Wastes, National Laboratory of Mineral Materials, School of Materials Science and Technology, China University of Geosciences, Beijing100083, China*

<sup>b</sup> *School of Gemmology, China University of Geosciences, Beijing100083, China*

\* Author to whom correspondence should be addressed: **Libing Liao, Lefu Mei**

---

\* \* Corresponding Authors

**Libing Liao**, E-mail: clayl@cugb.edu.cn

**Lefu Mei**, E-mail: mlf@cugb.edu.cn

**Tel.: +86-10-82322039; +86-10-8233-1701**

**Fax.: +86-10-82322974; +86-10-8232-1701**

Table S1 Fractional atomic coordinates, and occupancies parameters of  $\text{BLSi}_1\text{Ge}_2\text{F}$  obtained from the Topas Rietveld Refinement using X-ray powder diffraction data at room temperature.

| Atom | <i>x</i>    | <i>y</i>    | <i>z</i>    | occ  | beq  |
|------|-------------|-------------|-------------|------|------|
| La2  | 0.24205(23) | 0.98677(31) | 0.25        | 0.55 | 1    |
| Ba2  | 0.24205(23) | 0.98677(31) | 0.25        | 0.45 | 1    |
| La1  | 0.6666667   | 0.3333333   | 0.99899(63) | 0.55 | 1    |
| Ba1  | 0.6666667   | 0.3333333   | 0.99899(63) | 0.45 | 1    |
| Si1  | 0.4475(35)  | 0.4056(34)  | 0.25        | 0.33 | 1    |
| Ge1  | 0.39391(65) | 0.36443(82) | 0.25        | 0.67 | 1    |
| O1   | 0.5974      | 0.4496      | 0.25        | 1    | 1    |
| O2   | 0.3442      | 0.4996      | 0.25        | 1    | 1    |
| O3   | 0.3560      | 0.2721      | 0.0751      | 1    | 1    |
| F    | 0           | 0           | 0.25        | 1    | 2.81 |

Table s2 Fractional atomic coordinates, and occupancies parameters of  $\text{BLSi}_2\text{Ge}_1\text{F}$  obtained from the Topas Rietveld Refinement using X-ray powder diffraction data at room temperature.

| Atom | <i>x</i>    | <i>y</i>    | <i>z</i>    | occ  | beq  |
|------|-------------|-------------|-------------|------|------|
| La2  | 0.23989(25) | 0.98658(37) | 0.25        | 0.55 | 1    |
| Ba2  | 0.23989(25) | 0.98658(37) | 0.25        | 0.45 | 1    |
| La1  | 0.6666667   | 0.3333333   | 0.99822(73) | 0.55 | 1    |
| Ba1  | 0.6666667   | 0.3333333   | 0.99822(73) | 0.45 | 1    |
| Si2  | 0.4358(17)  | 0.3832(21)  | 0.25        | 0.67 | 1    |
| Ge1  | 0.3840(15)  | 0.3625(24)  | 0.25        | 0.33 | 1    |
| O1   | 0.5974      | 0.4496      | 0.25        | 1    | 1    |
| O2   | 0.3442      | 0.4996      | 0.25        | 1    | 1    |
| O3   | 0.3560      | 0.2721      | 0.0751      | 1    | 1    |
| F    | 0           | 0           | 0.25        | 1    | 2.81 |

Table S3 Comparison of cell parameters for BLGOF, BLGe<sub>2</sub>Si<sub>1</sub>F, BLGe<sub>2</sub>Si<sub>1</sub>F, and BLSOF. To be more intuitive, the microstructure of BLGOF:0.15Tb<sup>3+</sup>

| Formula                             | a (nm) | c(nm)  | V(nm <sup>3</sup> ) |
|-------------------------------------|--------|--------|---------------------|
| BLGOF                               | 1.0157 | 0.7464 | 0.6668              |
| BLGe <sub>2</sub> Si <sub>1</sub> F | 1.0056 | 0.7433 | 0.6509              |
| BLGe <sub>2</sub> Si <sub>1</sub> F | 0.9959 | 0.7402 | 0.6358              |
| BLSOF                               | 0.9864 | 0.7363 | 0.6204              |
